# Supplementary material for: Evaluation of low-pass genome sequencing in polygenic risk score calculation for Parkinson’s disease
Source: PubMed Central journal article supplement (PMC8403377; doi:10.1186/s40246-021-00357-w), 2021-08-28

**a**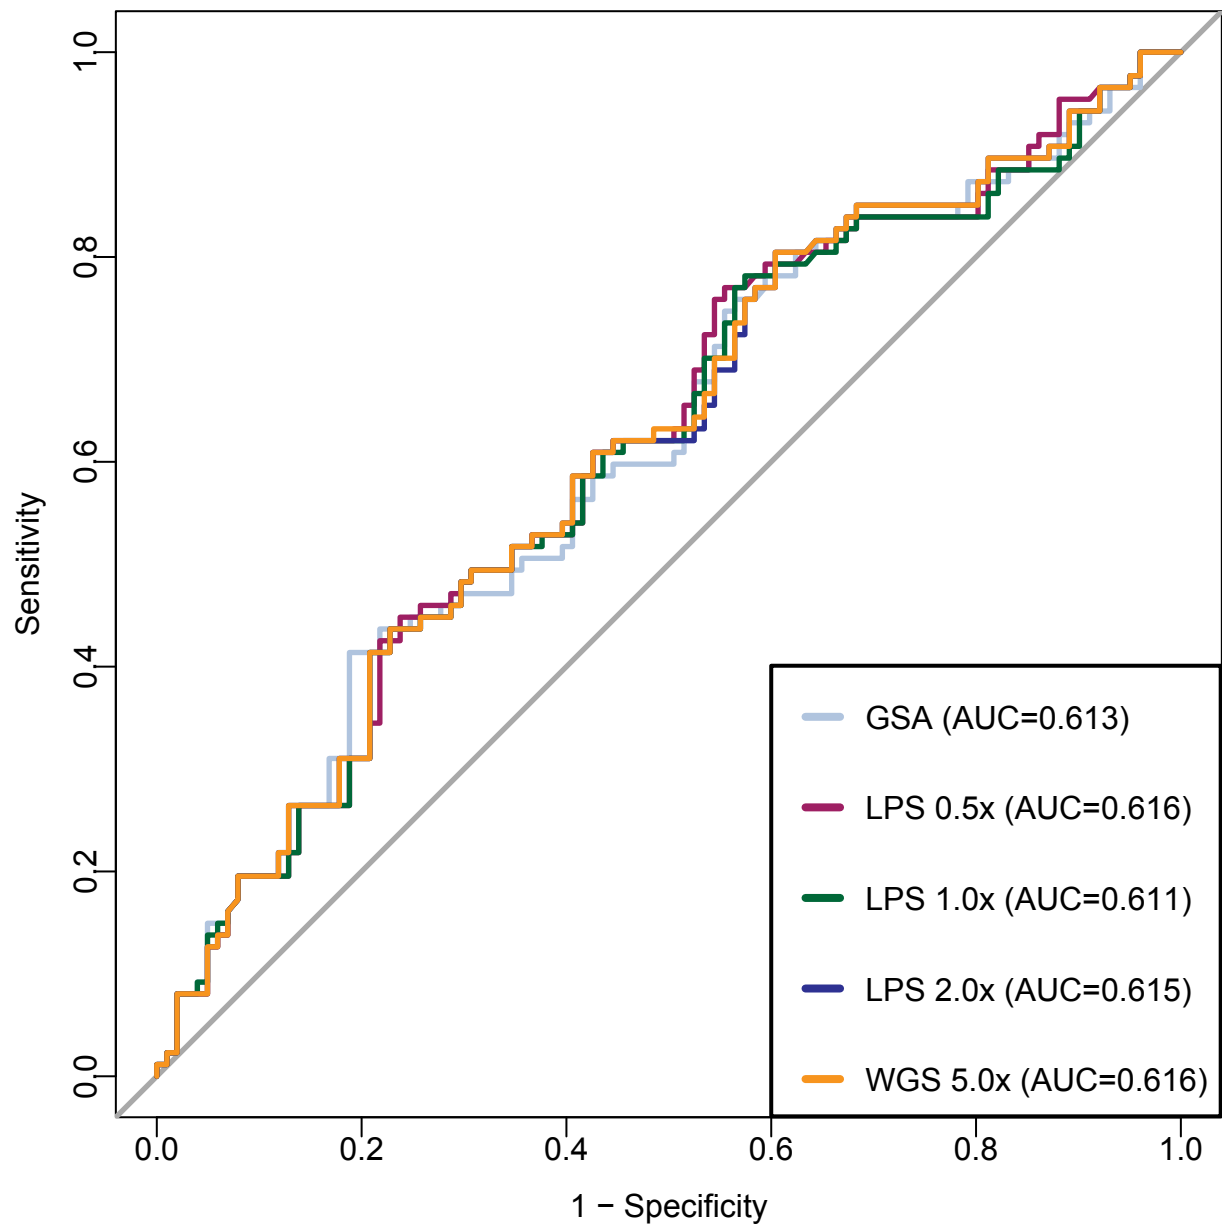**b**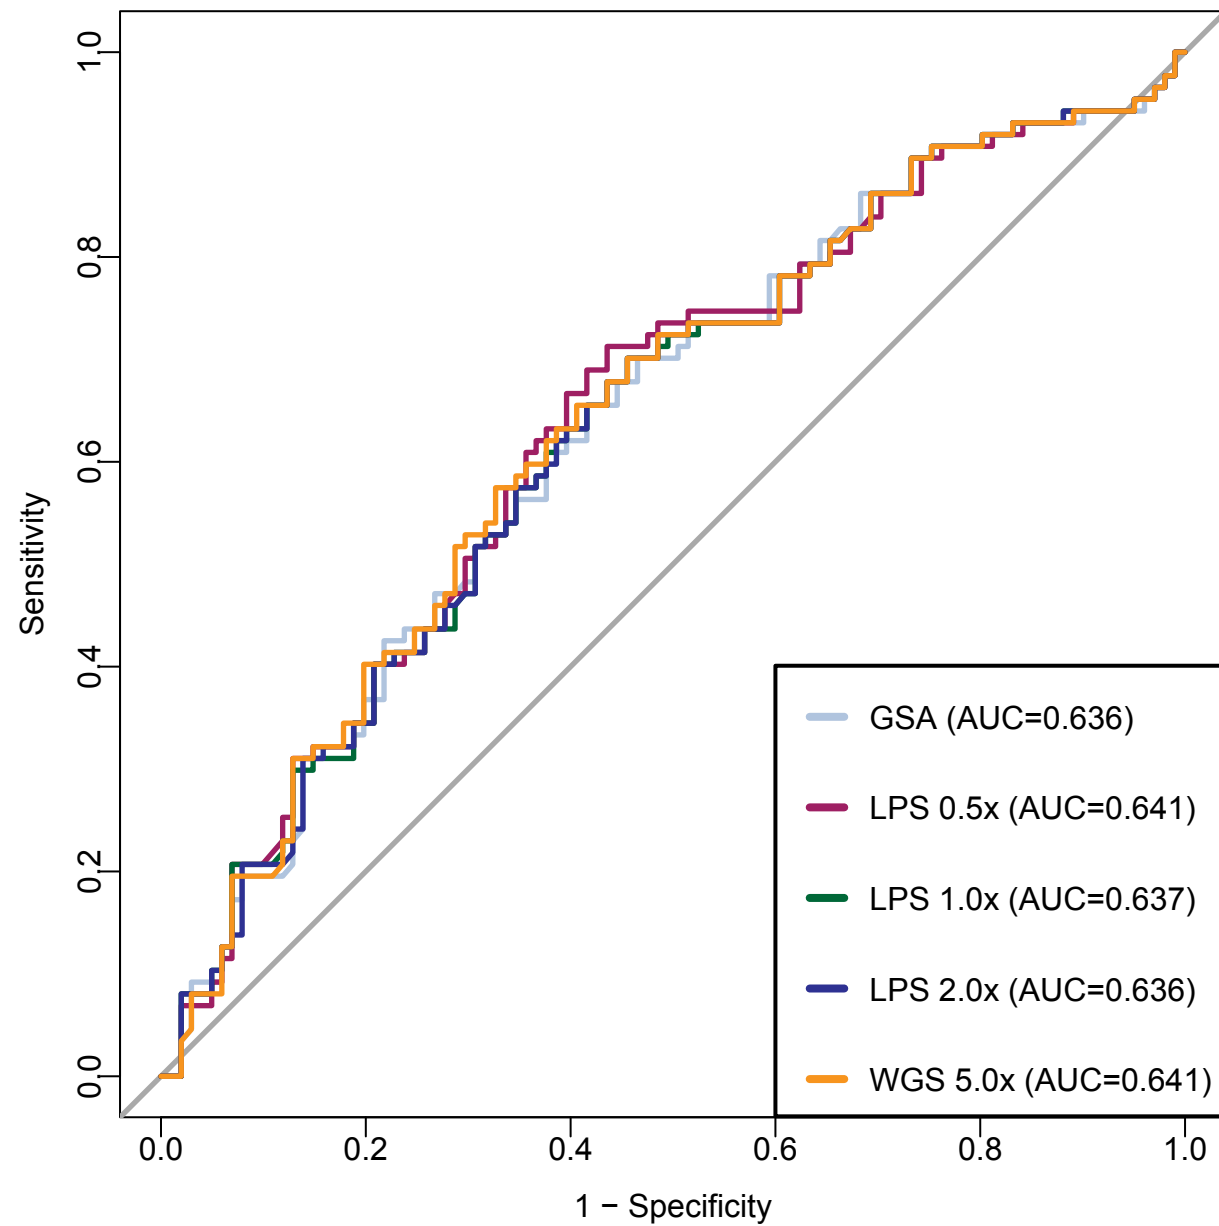

Supplement: 40246_2021_357_MOESM10_ESM.pdf [file 40246_2021_357_MOESM10_ESM.pdf]
